# Supplementary material for: Quantitative resistance to clubroot infection mediated by transgenerational epigenetic variation in Arabidopsis
Source: PubMed Central journal article supplement (PMC6587750; doi:10.1111/nph.15579), 2018-11-30
Supplement: NPH-222-468-s003.pdf [file NPH-222-468-s003.pdf]

## ***New Phytologist* Supporting Information**

Article title: Quantitative resistance to clubroot infection mediated by transgenerational epigenetic variation in *Arabidopsis*

Authors: Benjamin Liégard, Victoire Baillet, Mathilde Etcheverry, Evens Joseph, Christine Lariagon, Jocelyne Lemoine, Aurélie Evrard, Vincent Colot, Antoine Gravot, Maria J. Manzanares-Dauleux, Mélanie Jubault.

Article acceptance date: 26 October 2018

The following Supporting Information is available for this article:

**Fig. S1.** Epi-allele effects at the closest QTL<sup>epi</sup> peak marker.

**Fig. S2.** Boxplot of temperature data recorded in each growth room.

**Fig. S3.** Comparison of the epi-allele effects at the closest QTL<sup>epi</sup> peak marker between Lfi and Lfni in growth chamber 2.

**Table S1:** List of primer sets used to confirm homozygosity of the T-DNA insertion in mutants.

**Table S2.** (a) Disease index for Col-0 and mutants after infection by *Plasmodiophora brassicae*. (b) Dunnett post hoc test results.

**Table S3.** Phenotypic responses of epiRIL and their parent lines to infection by *Plasmodiophora brassicae*.

Table S4. Analysis of epigenotype, temperature and interaction between temperature and epigenotype effect for each trait in infected condition.

**Table S5:** Dunnett test comparison of temperatures recorded by each temperature sensor in growth room-2.

**Table S6.** Median temperature monitored by each temperature sensor in growth room-2.



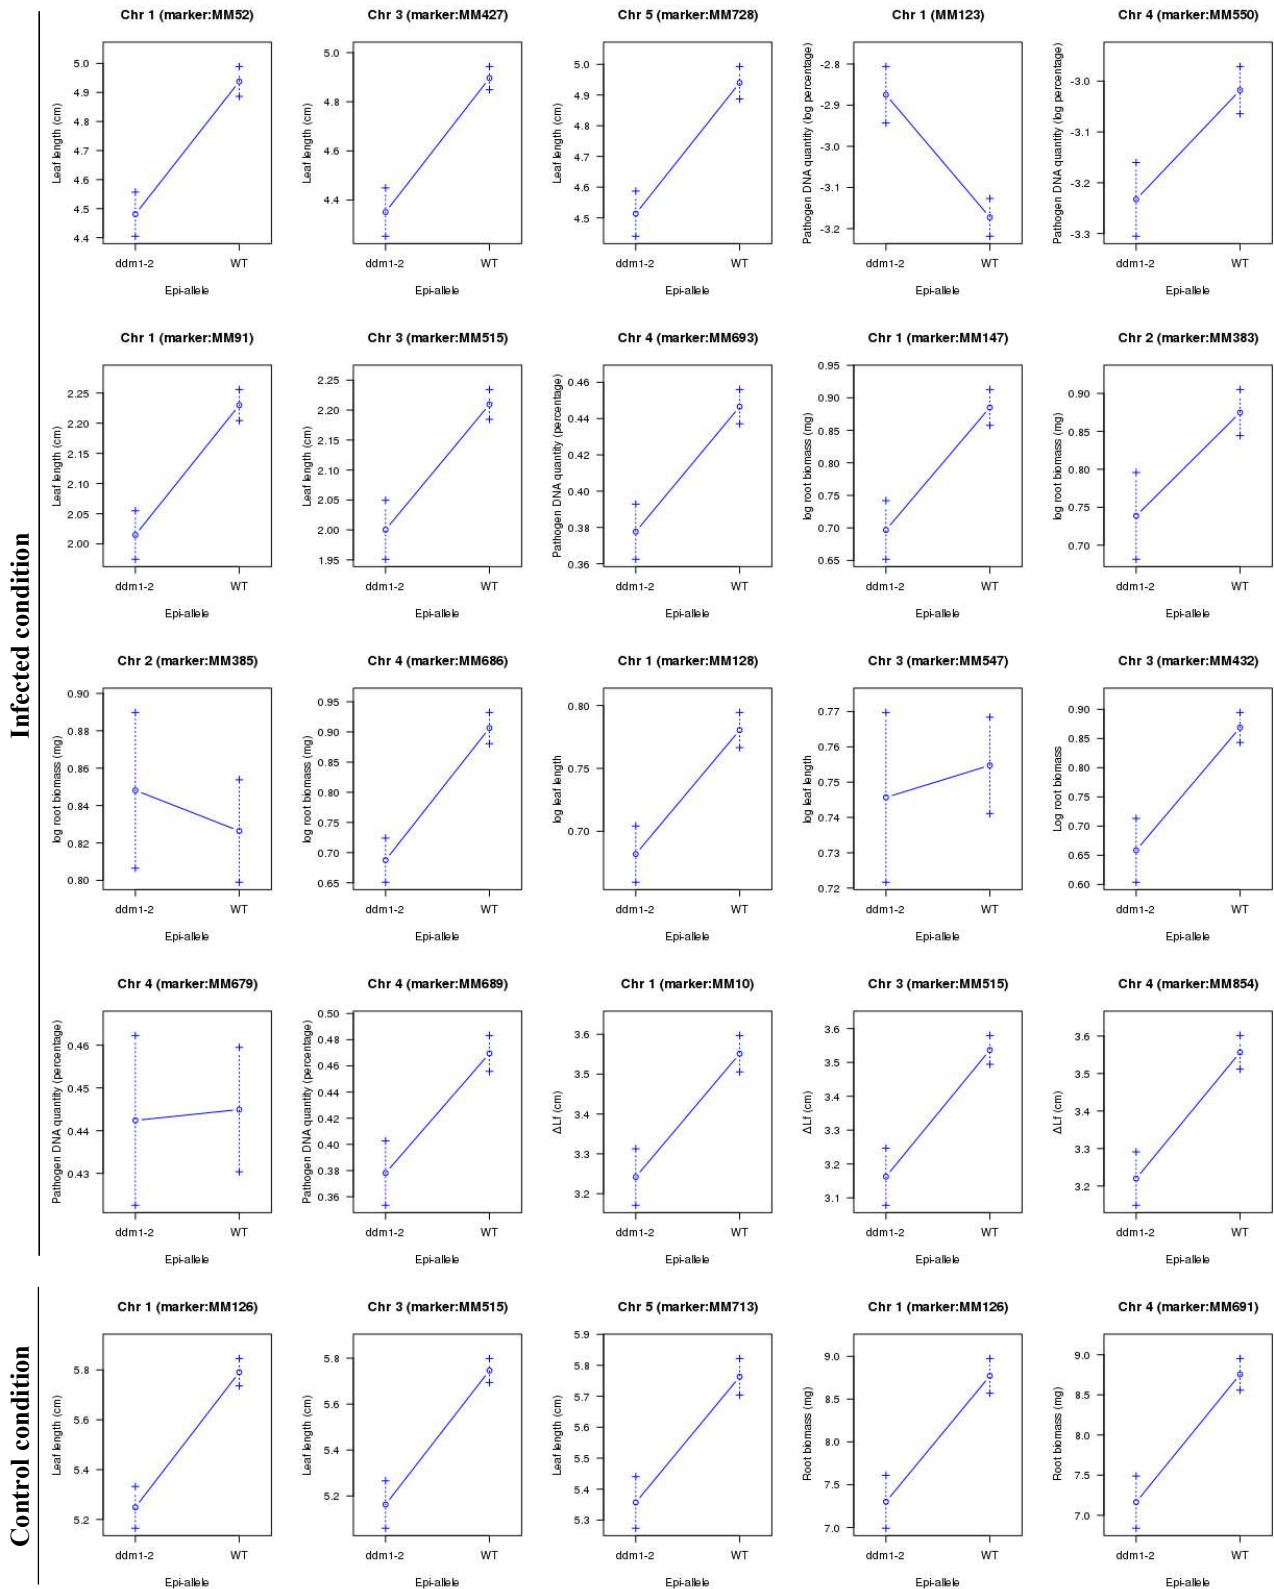

**Fig. S1.** Epi-allele effects at the closest QTL<sup>epi</sup> peak marker. All graphics show the effect of each epi-allele on the trait value at the closest QTL peak marker. For all QTL<sup>epi</sup> detected for root biomass, leaf length, pathogen quantity and  $\Delta Lf$  in growth room-2, the *ddm1-2* epi-allele is associated with a lower value than the WT epi-allele. For all QTL detected for the pathogen quantity in growth room-1, the *ddm1-2* epi-allele is associated with a higher value than the WT epi-allele.

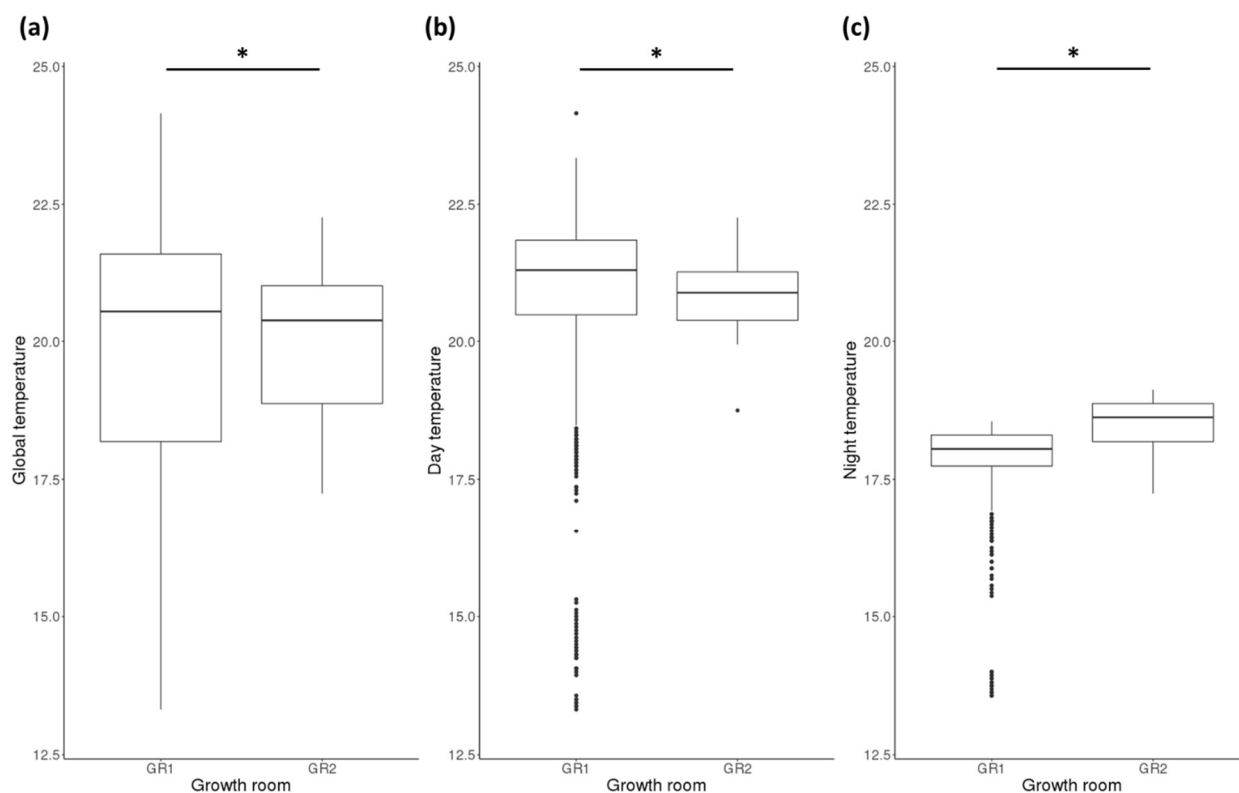

**Fig. S2.** Boxplot of temperature data recorded in each growth room. (a) Global temperature in each growth room. Stars indicate the significant difference (Fisher permutation test,  $F = 2.67$ ,  $p\text{-value} = 0.002$ ) of the variance of the global temperature between the two growth rooms. (b) Day temperature in each growth room. Stars indicate the significant difference (Fisher permutation test,  $F = 9.05$ ,  $p\text{-value} = 0.002$ ) of the variance of the day temperature between the two growth rooms. (c) Night temperature in each growth room. Stars indicate the significant difference (Fisher permutation test,  $F = 3.67$ ,  $p\text{-value} = 0.002$ ) of the variance of the day temperature between the two growth rooms. Boxplot showed the median (inner box black horizontal line), the 25 and the 75 percentiles (box), the 1.5 times interquartile (vertical line) and the extreme values (black dots).

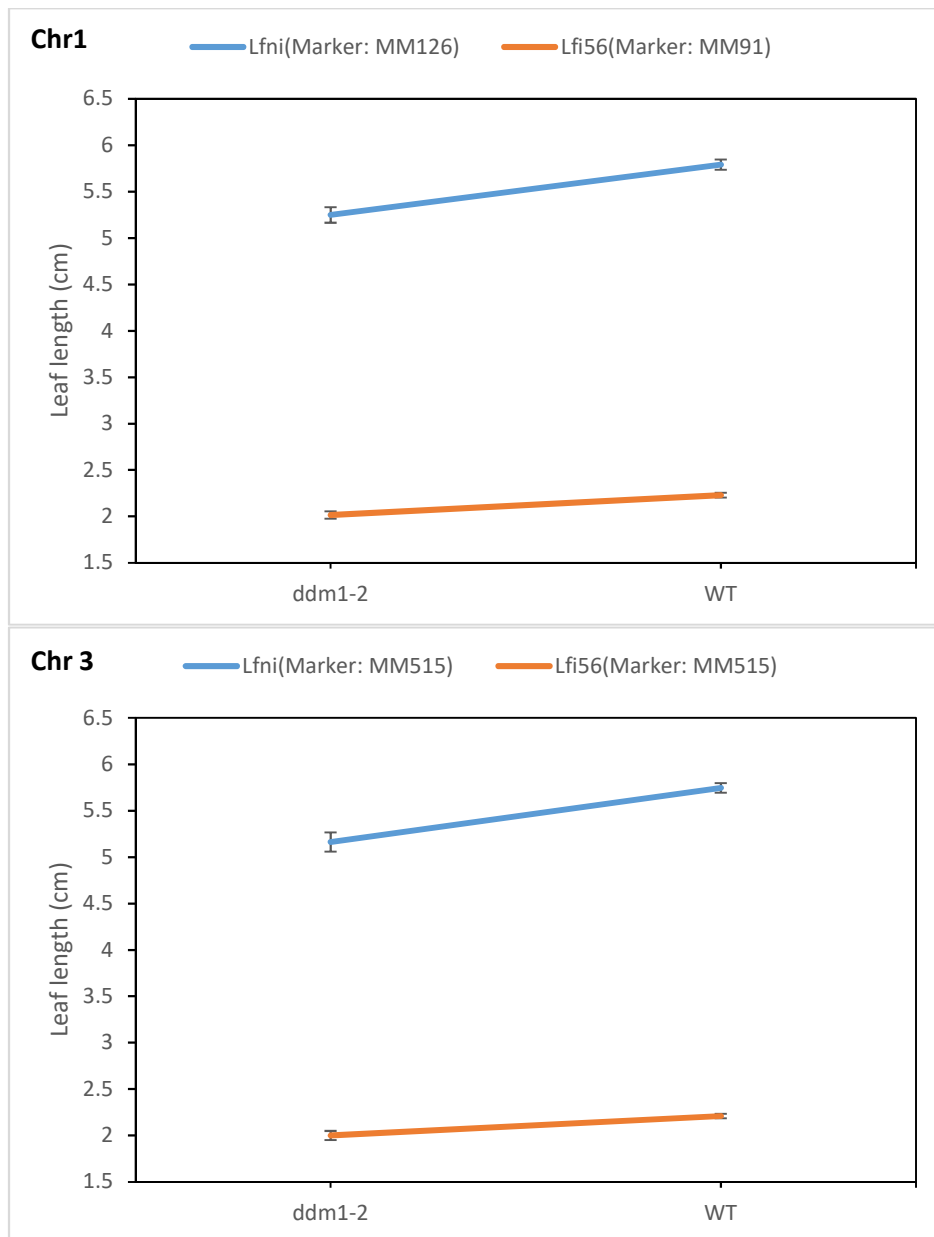

**Fig. S3.** Comparison of the epi-allele effects at the closest QTL<sup>epi</sup> peak marker between Lfi and Lfni in growth chamber 2. The effect of each epi-allele at the closest QTL peak marker on the trait value is shown for the leaf length in infected condition and control condition. For the two QTL<sup>epi</sup> detected on the chromosomes 1 and 3 in inoculated and inoculated conditions, the difference between the effect of the epiallele WT and the epiallele *ddm1-2* is less important in infected condition than in control condition, illustrating the modulation of the epigenetic effect on the leaf length by the infection.

**Table S1.** List of primer sets used to confirm homozygosity of the T-DNA insertion in mutants.

| NASC number | Mutant       | Gene      | LP primer (5' > 3')    | RP primer (5' > 3')     |
|-------------|--------------|-----------|------------------------|-------------------------|
| N650863     | SALK_150863  | At5g14620 | AGATCGCTTCCAGAGTTAGCC  | TTGTTCGCAAAAAGCAAAAAGAG |
| N655230     | SALK_004027C | At3g18520 | CTTCTCTGTTTCATCGTTTCGC | AGCAACATTCTCTCGTCGAAC   |
| N667337     | SALK_130607C | At5g09790 | TTTCTCTTGTCCGGTGAAATG  | CCTGCAACAATCAGTGTGATG   |
| N681376     | SALK_082118C | At1g79000 | GACTGACAGGTCTTTGCTTGG  | ATGAACCTGGAATGGAGAACC   |
| N681865     | SALK_149295C | At5g09230 | CGCAGAGAGAGAACAAAATCG  | TTCCACATTCTGTGCTAACCC   |
| N681885     | SALK_000590C | At5g66750 | GAAGACAGGTTTCACCTGTGC  | CGTGAGAAATAGCTCAATGCC   |

**Table S2.** (a) Disease index for Col-0 and mutants after infection by *Plasmodiophora brassicae*. (b) Dunnett post hoc test results.

(a)

| <b>Lines</b>  | <b>Means</b> | <b>Sd</b> |
|---------------|--------------|-----------|
| <i>ddm1</i> * | 46.56        | 14.63     |
| <i>srt2</i>   | 61.67        | 12.58     |
| <i>drm2</i>   | 66.67        | 14.43     |
| <i>atxr5</i>  | 70.28        | 15.28     |
| <i>hac1</i>   | 70.56        | 18.96     |
| <b>Col-0</b>  | 77.09        | 8.23      |
| <i>hdc15</i>  | 84.72        | 19.7      |

Disease index calculation was carried out according to Manzanares-Dauleux *et al.* (2000b). Means were obtained by averaging the data from three blocks with six plants by block. Standard deviation (Sd) was obtained from the difference in DI between the three blocks for each mutant and Col-0. The star next to *ddm1* indicates significant differences for the disease index compared to Col-0.

(b)

| <b>DI genotype comparison</b> | <b>Estimate</b> | <b>Std.Error</b> | <b>t value</b> | <b>Pr(&gt; t )</b> |
|-------------------------------|-----------------|------------------|----------------|--------------------|
| <i>atxr5</i> - Col-0          | -6.8083         | 6.880            | -0.990         | 0.86361            |
| <i>ddm1</i> - Col-0           | -30.5283        | 6.880            | -4.437         | 0.00269            |
| <i>drm2</i> - Col-0           | -10.4183        | 6.880            | -1.514         | 0.53771            |
| <i>hac1</i> - Col-0           | -6.5283         | 6.880            | -0.949         | 0.88306            |
| <i>hdc15</i> - Col-0          | 7.6383          | 6.880            | 1.110          | 0.79812            |
| <i>srt2</i> - Col-0           | -15.4183        | 6.880            | -2.241         | 0.18262            |

Test was carried using multcomp R package.

**Table S3.** Phenotypic responses of epiRIL and their parent lines to infection by *Plasmodiophora brassicae*.

| Lines         | Condition | Growth room | Leaf length (cm) | Root biomass (mg per plant) | Pathogen DNA quantity (%) | Disease index |
|---------------|-----------|-------------|------------------|-----------------------------|---------------------------|---------------|
| Col-0         | Infected  | 1           | 5.52 ± 0.59      | NA                          | 0.036 ± 0.01              | 53.25 ± 2.36  |
|               |           | 2           | 1.98 ± 0.34      | 1.95 ± 0.23                 | 0.45 ± 0.05               | 90.75 ± 9.64  |
|               | Control   | 2           | 5.98 ± 0.39      | 14.12 ± 4.43                | NA                        | NA            |
| <i>ddm1-2</i> | Infected  | 1           | NA               | NA                          | NA                        | NA            |
|               |           | 2           | 2.12 ± 0.54      | 2.16 ± 0.72                 | 0.31 ± 0.13               | 71.75 ± 17.11 |
|               | Control   | 2           | 4.28 ± 0.10      | 8.17 ± 2.84                 | NA                        | NA            |
| Epirils       | Infected  | 1           | 4.80 ± 0.75      | NA                          | 0.052 ± 0.04              | 51.17 ± 11.42 |
|               |           | 2           | 2.17 ± 0.47      | 2.41 ± 0.95                 | 0.43 ± 0.17               | 86.27 ± 10.74 |
|               | Control   | 2           | 5.63 ± 0.78      | 8.36 ± 3.64                 | NA                        | NA            |

Disease index calculation was carried out according to Manzanares-Dauleux *et al.* (2000). Pathogen DNA quantification was determined by quantitative PCR. For each trait, condition and growth room, means were obtained by averaging data of two biological replicates, each one designed with two blocks and six plants per block. Standard deviation (Sd) was obtained from the difference in each trait between the four blocks. NA stands for non available.



**Table S4. Analysis of epigenotype, temperature and interaction between temperature and epigenotype effect for each trait in infected condition.** Effect was estimated using the (glm, model 1) for the G effect and using the glm (model 2) for the temperature effect and GT effect.

| Trait measured | Growth room | Epigenotype effect (G)                        | Interaction between temperature and epigenotype effect (GT) | Temperature effect                         |
|----------------|-------------|-----------------------------------------------|-------------------------------------------------------------|--------------------------------------------|
| Lfi            | GR1         | $\chi^2 = 126.32, p\text{-value} < 2.2e-16$   | NA                                                          | NA                                         |
|                | GR2         | $\chi^2 = 32.74, p\text{-value} < 2.2e-16$    | $\chi^2 = 23.58, p\text{-value} < 2.2e-16$                  | $\chi^2 = 10.14, p\text{-value} < 2.2e-16$ |
| DI             | GR1         | $\chi^2 = 22256.3, p\text{-value} = 1.57e-06$ | NA                                                          | NA                                         |
|                | GR2         | $\chi^2 = 2.69, p\text{-value} = 1.65e-4$     | DI: $\chi^2 = 1.79, p\text{-value} = 0.44$                  | $\chi^2 = 0.005, p\text{-value} = 0.54$    |
| Pb             | GR1         | $\chi^2 = 71.73, p\text{-value} = 0.02$       | NA                                                          | NA                                         |
|                | GR2         | $\chi^2 = 3.75, p\text{-value} = 0.35$        | Pb: $\chi^2 = 4.20, p\text{-value} = 0.01$                  | $\chi^2 = 0.01, p\text{-value} = 0.53$     |
| Rbi            | GR1         | NA                                            | NA                                                          | NA                                         |
|                | GR2         | $\chi^2 = 28.05, p\text{-value} < 2.2e-16$    | Rbi: $\chi^2 = 14.51, p\text{-value} = 0.002$               | $\chi^2 = 2.98, p\text{-value} = 2.94e-09$ |

**Table S5.** Dunnett test comparison of temperatures recorded by each temperature sensor in growth room-2.

|             | Ts1        | Ts2         | Ts3         | Ts4        | Ts5             | Ts6         | Ts7             | Ts8        | Ts9        | Ts10            | Ts11       | Ts12        | Ts13        | Ts14       | Ts15        |
|-------------|------------|-------------|-------------|------------|-----------------|-------------|-----------------|------------|------------|-----------------|------------|-------------|-------------|------------|-------------|
| <b>Ts2</b>  | < 2.00E-16 | -           | -           | -          | -               | -           | -               | -          | -          | -               | -          | -           | -           | -          | -           |
| <b>Ts3</b>  | < 2.00E-16 | 6.50E-06    | -           | -          | -               | -           | -               | -          | -          | -               | -          | -           | -           | -          | -           |
| <b>Ts4</b>  | < 2.00E-16 | 1.10E-04    | < 2.00E-16  | -          | -               | -           | -               | -          | -          | -               | -          | -           | -           | -          | -           |
| <b>Ts5</b>  | < 2.00E-16 | < 2.00E-16  | < 2.00E-16  | < 2.00E-16 | -               | -           | -               | -          | -          | -               | -          | -           | -           | -          | -           |
| <b>Ts6</b>  | < 2.00E-16 | < 2.00E-16  | < 2.00E-16  | < 2.00E-16 | <b>1.00</b>     | -           | -               | -          | -          | -               | -          | -           | -           | -          | -           |
| <b>Ts7</b>  | < 2.00E-16 | < 2.00E-16  | < 2.00E-16  | < 2.00E-16 | <b>5.90E-02</b> | 2.90E-06    | -               | -          | -          | -               | -          | -           | -           | -          | -           |
| <b>Ts8</b>  | < 2.00E-16 | < 2.00E-16  | < 2.00E-16  | < 2.00E-16 | 1.77E-02        | <b>1.00</b> | 2.90E-06        | -          | -          | -               | -          | -           | -           | -          | -           |
| <b>Ts9</b>  | 2.6 E-16   | < 2.50E-06  | <b>1.00</b> | < 2.00E-16 | < 2.00E-16      | < 2.00E-16  | < 2.00E-16      | < 2.00E-16 | -          | -               | -          | -           | -           | -          | -           |
| <b>Ts10</b> | < 2.00E-16 | < 2.00E-16  | < 2.00E-16  | 3.50E-05   | 6.40E-13        | < 2.00E-16  | 2.30E-04        | < 2.00E-16 | < 2.00E-16 | -               | -          | -           | -           | -          | -           |
| <b>Ts11</b> | < 2.00E-16 | <b>1.00</b> | 3.60E-08    | 2.54E-02   | < 2.00E-16      | < 2.00E-16  | < 2.00E-16      | < 2.00E-16 | 1.50E-08   | 1.70E-14        | -          | -           | -           | -          | -           |
| <b>Ts12</b> | < 2.00E-16 | < 2.00E-16  | < 2.00E-16  | 3.90E-12   | 2.50E-06        | 2.20E-12    | <b>1.00</b>     | < 2.00E-16 | < 2.00E-16 | <b>1.00</b>     | < 2.00E-16 | -           | -           | -          | -           |
| <b>Ts13</b> | < 2.00E-16 | < 2.00E-16  | < 2.00E-16  | < 2.00E-16 | 2.5E-16         | 1.70E-09    | < 2.00E-16      | 7.40E-06   | < 2.00E-16 | < 2.00E-16      | < 2.00E-16 | < 2.00E-16  | -           | -          | -           |
| <b>Ts14</b> | < 2.00E-16 | < 2.00E-16  | < 2.00E-16  | < 2.00E-16 | 4.80E-12        | 3.10E-06    | < 2.00E-16      | 2.68E-03   | < 2.00E-16 | < 2.00E-16      | < 2.00E-16 | < 2.00E-16  | <b>1.00</b> | -          | -           |
| <b>Ts15</b> | < 2.00E-16 | < 2.00E-16  | < 2.00E-16  | 2.50E-14   | 5.80E-06        | 3.90E-12    | <b>1.00</b>     | < 2.00E-16 | < 2.00E-16 | <b>4.29E-01</b> | < 2.00E-16 | <b>1.00</b> | < 2.00E-16  | < 2.00E-16 | -           |
| <b>Ts16</b> | < 2.00E-16 | < 2.00E-16  | < 2.00E-16  | 8.60E-13   | 4.60E-07        | 1.20E-13    | <b>7.89E-01</b> | < 2.00E-16 | < 2.00E-16 | <b>1.00</b>     | < 2.00E-16 | <b>1.00</b> | < 2.00E-16  | < 2.00E-16 | <b>1.00</b> |

Adjusted *p-values* (Bonferroni method) calculated with the Dunnett test between each temperature sensor are presented in the bottom left of the table.

Ts corresponds to the temperature sensor number. Non-significant *p-values* of test were highlighted in bold.

**Table S6.** Median temperature monitored by each temperature sensor in growth room-2.

| <b>Temperature sensor</b> | <b>Median temperature</b> | <b>MAD</b> |
|---------------------------|---------------------------|------------|
| Ts1                       | 21.40                     | 0.74       |
| Ts2                       | 22.90                     | 0.74       |
| Ts3                       | 22.50                     | 0.74       |
| Ts4                       | 22.90                     | 0.74       |
| Ts5                       | 23.20                     | 0.74       |
| Ts6                       | 23.60                     | 0.74       |
| Ts7                       | 23.10                     | 0.74       |
| Ts8                       | 23.20                     | 1.11       |
| Ts9                       | 22.10                     | 0.74       |
| Ts10                      | 23.10                     | 0.74       |
| Ts11                      | 22.60                     | 0.74       |
| Ts12                      | 23.20                     | 0.74       |
| Ts13                      | 24.10                     | 0.74       |
| Ts14                      | 23.70                     | 0.74       |
| Ts15                      | 23.10                     | 0.74       |
| Ts16                      | 23.10                     | 0.74       |

MAD: Median absolute deviation. The median temperatures are in °C. Ts correspond to the temperature sensor number.

## REFERENCES

**Manzanares-Dauleux MJ, Divaret I, Baron F, Thomas G. 2000.** Evaluation of French *Brassica oleracea* landraces for resistance to *Plasmodiophora brassicae*. *Euphytica* **113**(3): 211-218.
